# Supplementary material for: Biochemical analysis to study wild-type and polyglutamine-expanded ATXN3 species
Source: PubMed Central journal article supplement (PMC11666052; doi:10.1371/journal.pone.0315868), 2024-12-23

Fig 1A

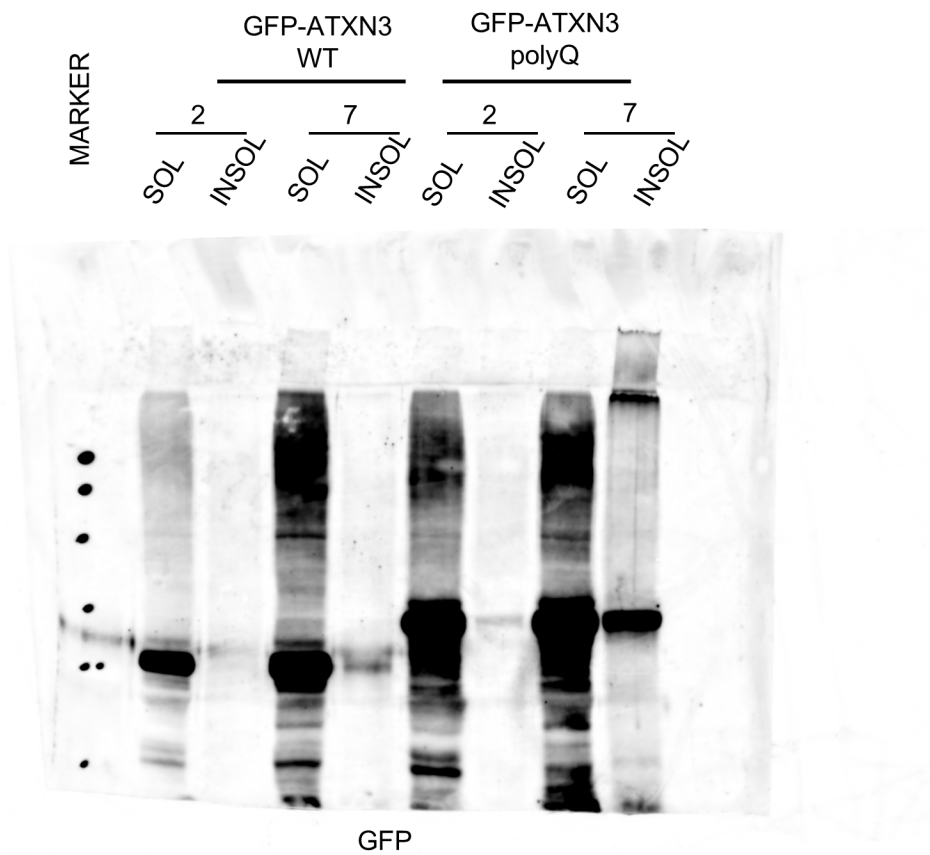

Fig 1B

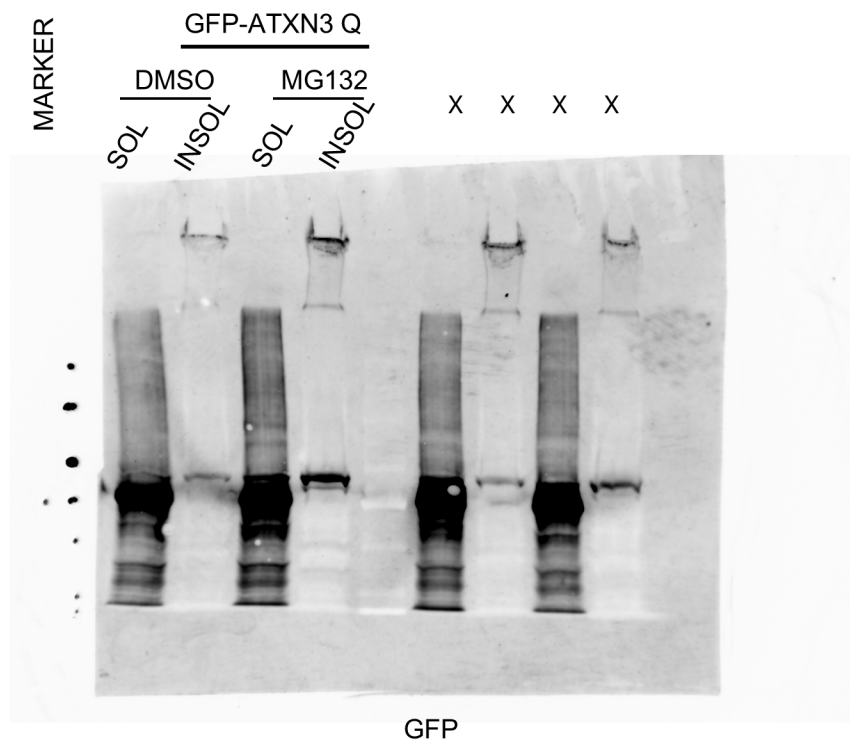

Fig 2A

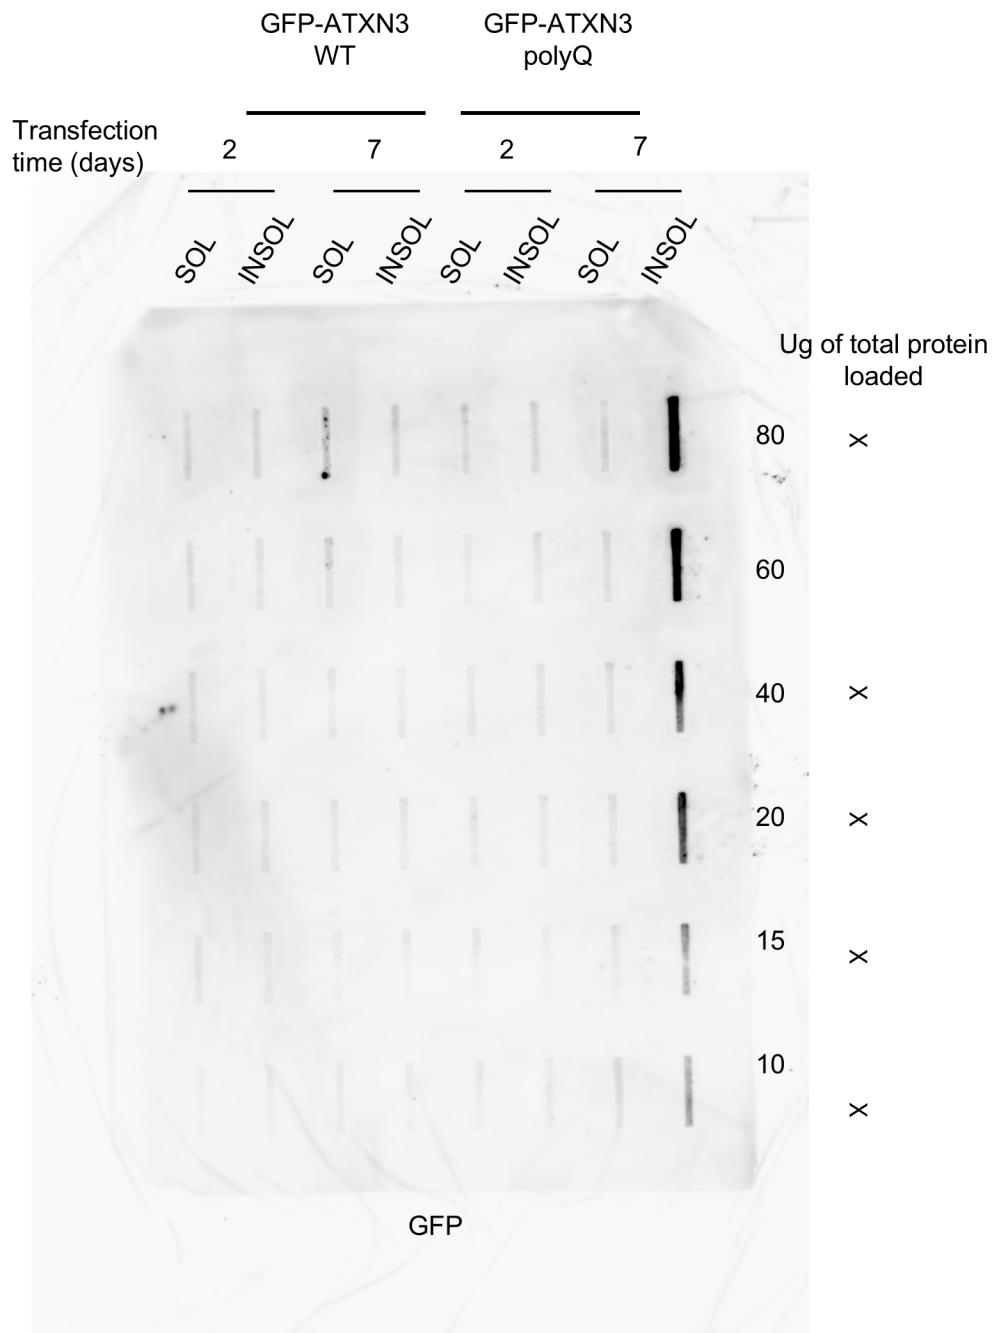



Fig 3A

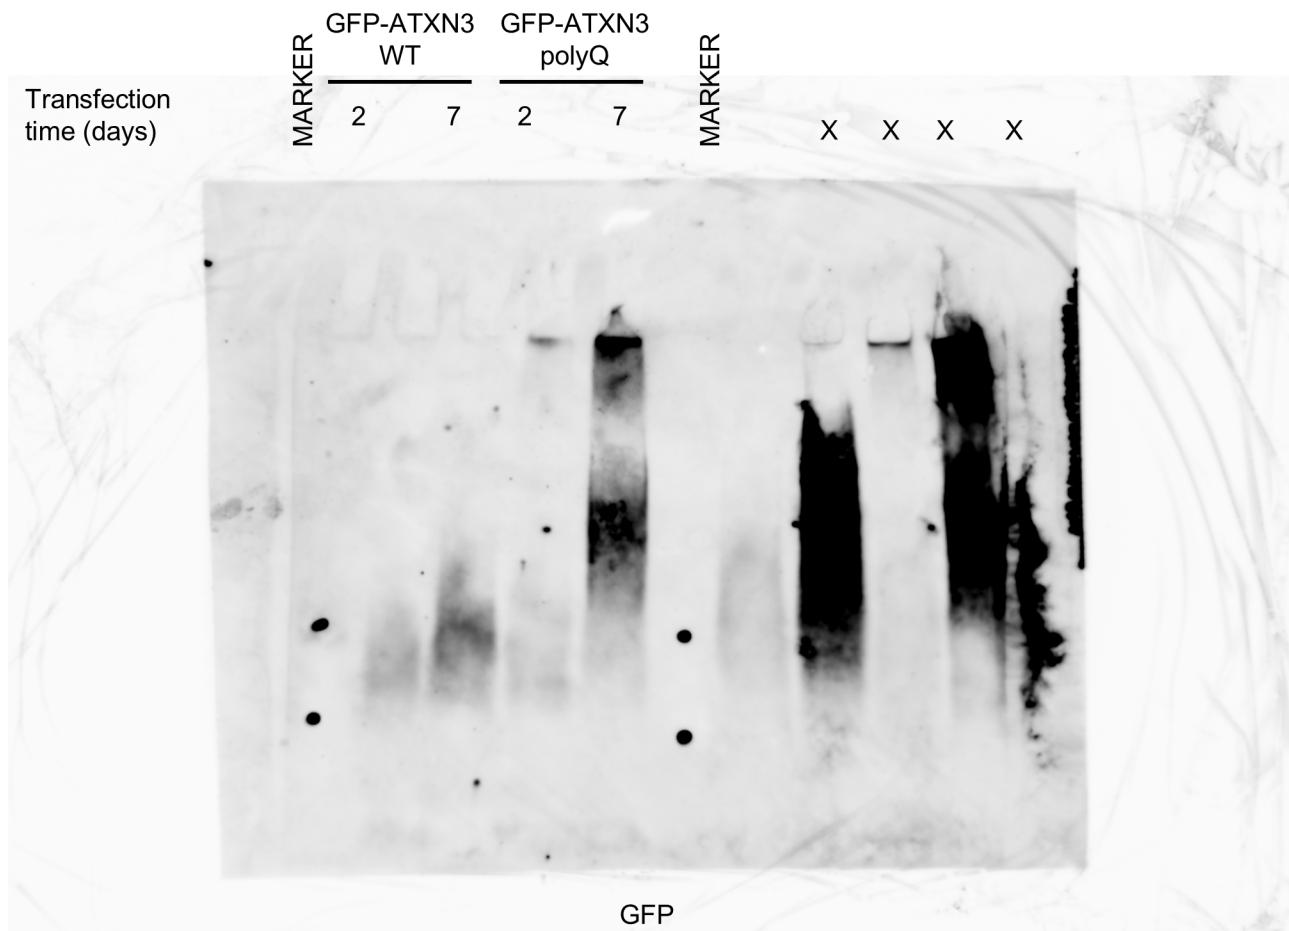

Fig 3B

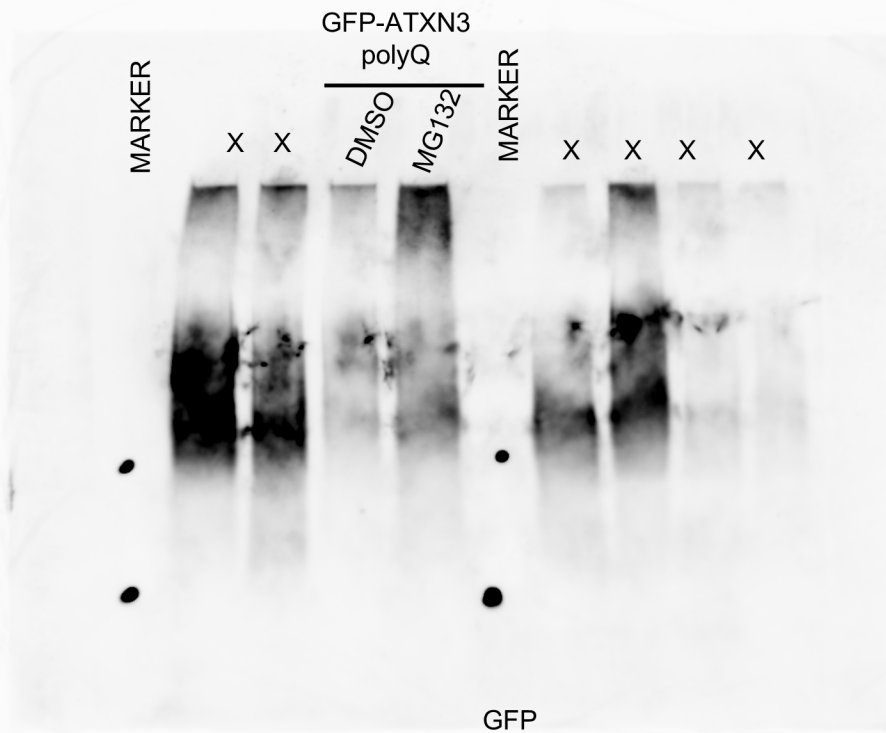

S1 FigA

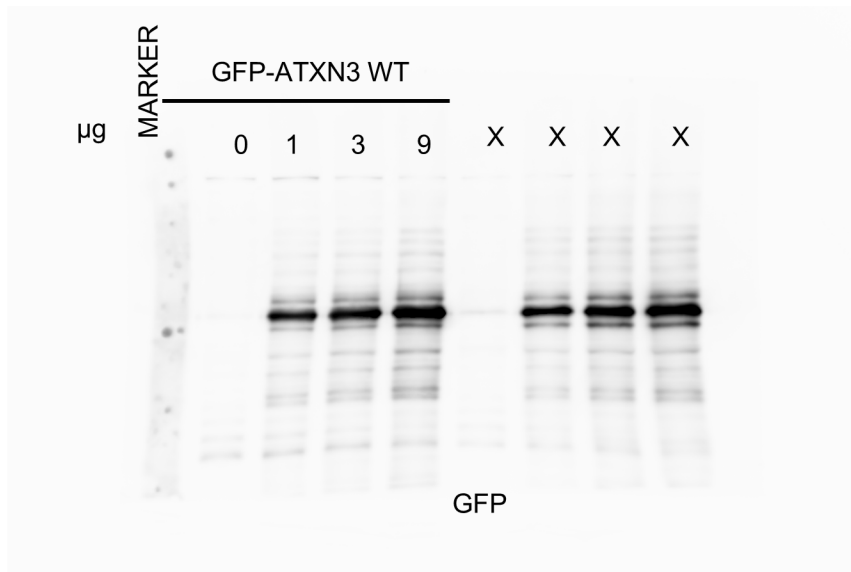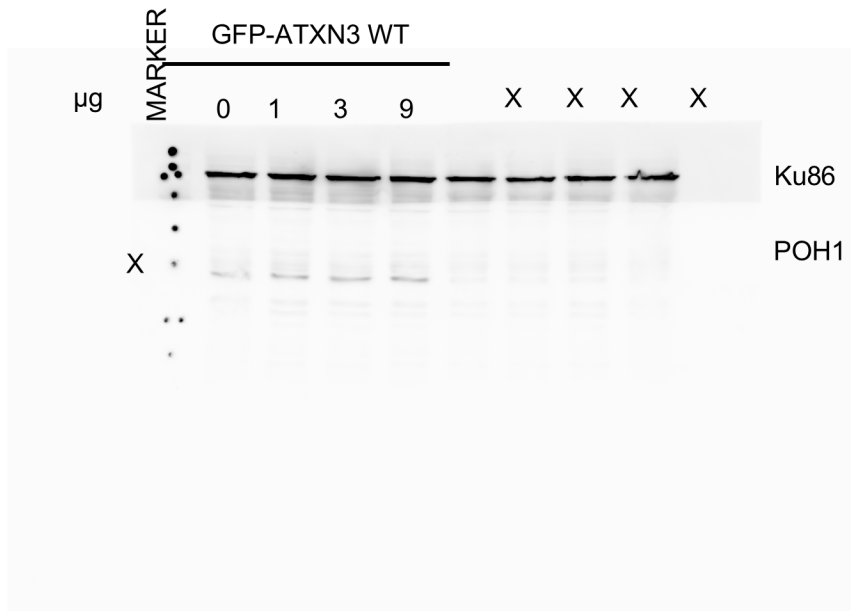



# S1 FigC left panel

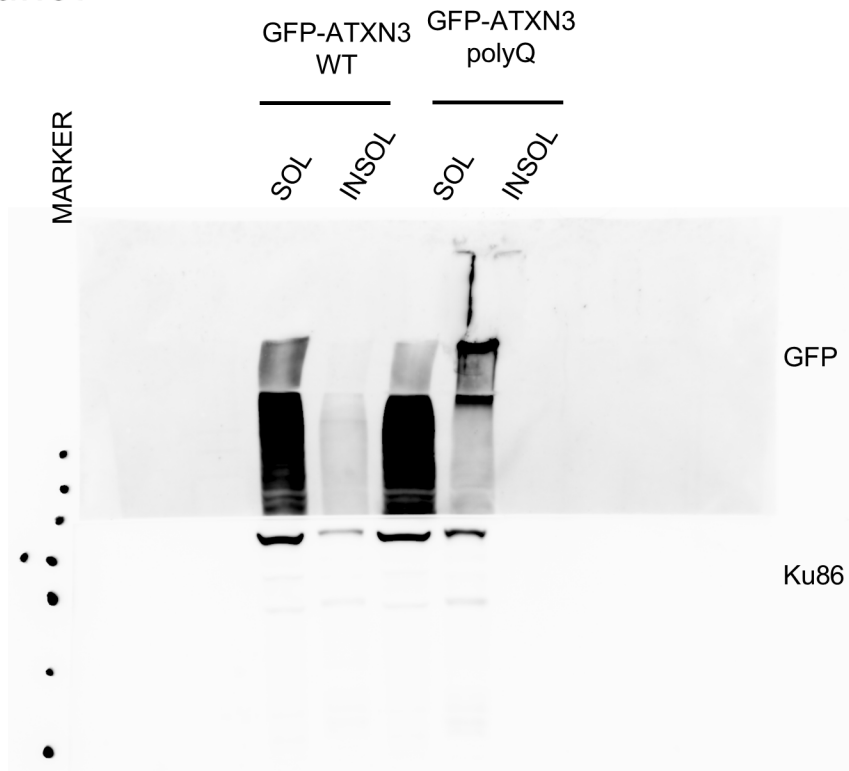

# S1 FigC right panel

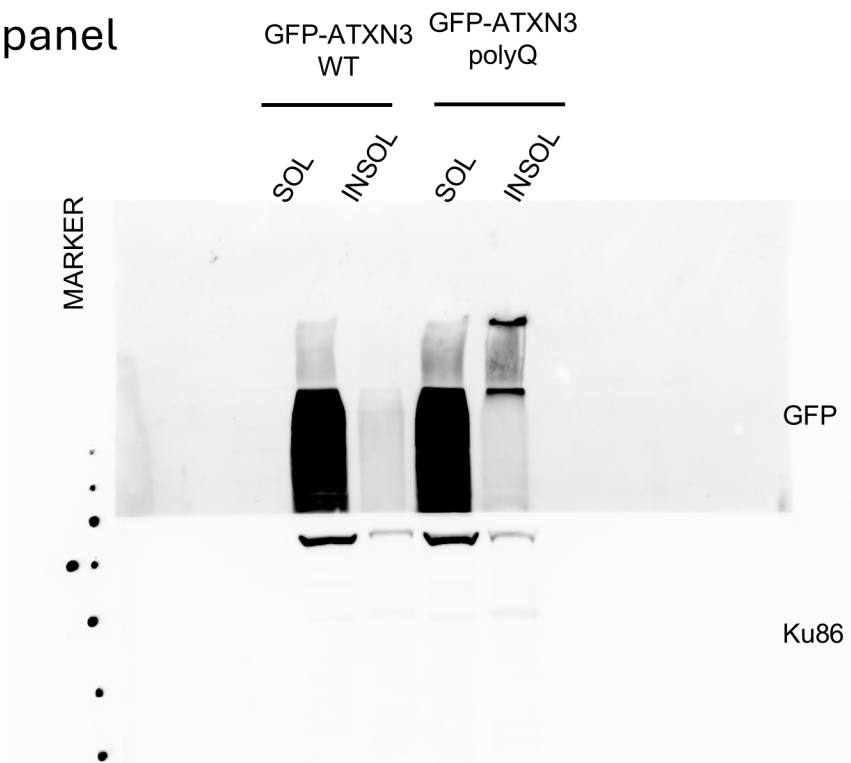

# S1 FigD

MARKER

X X

GFP-ATXN3 polyQ

Recombinant ATXN3 WT

SOL INSOL SOL INSOL

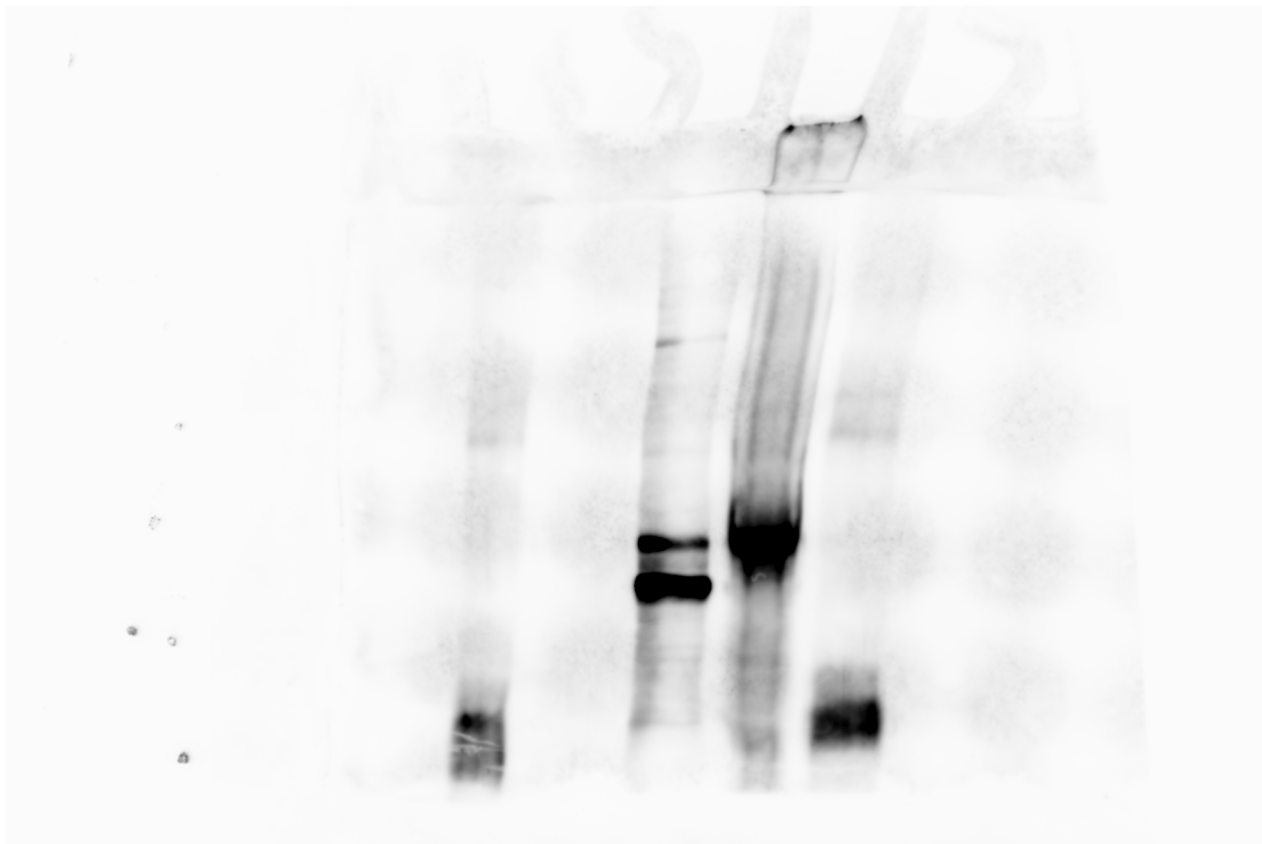

ATXN3 CT



# S1 FigE

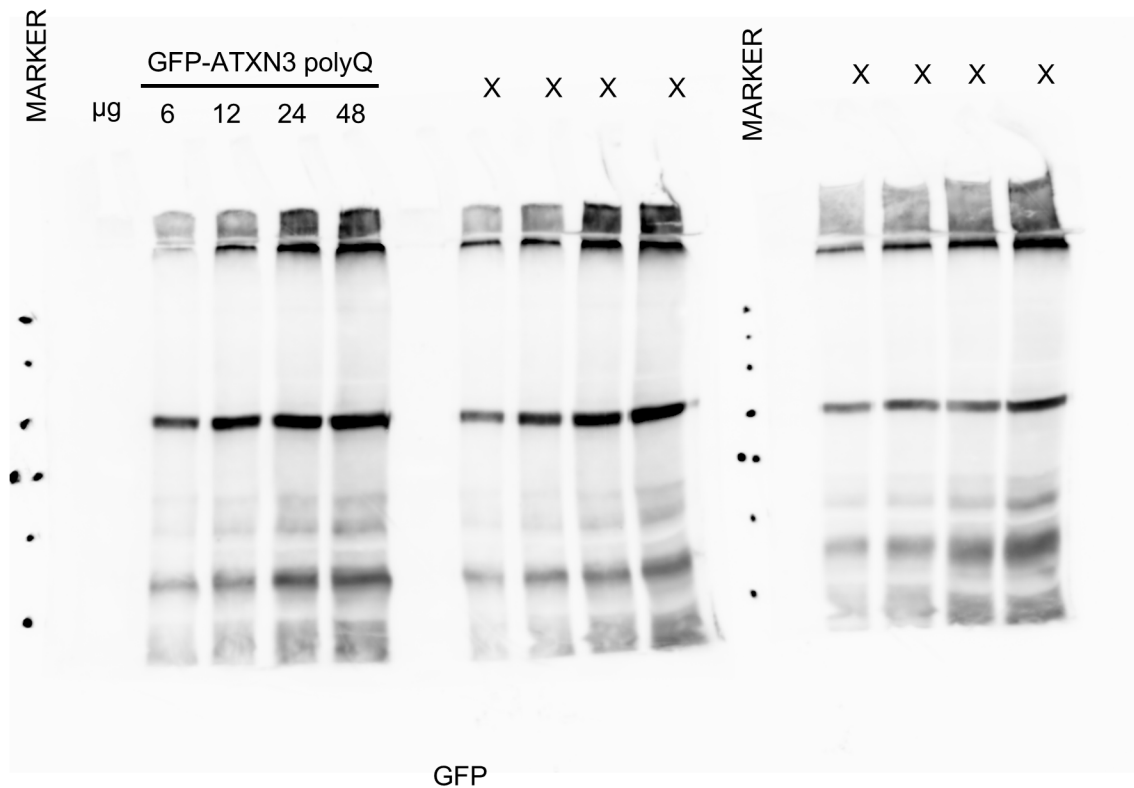

# S2 FigA

MARKER

GFP-ATXN3 polyQ

1 2 3 4 5 6 7

Transfection time (days)

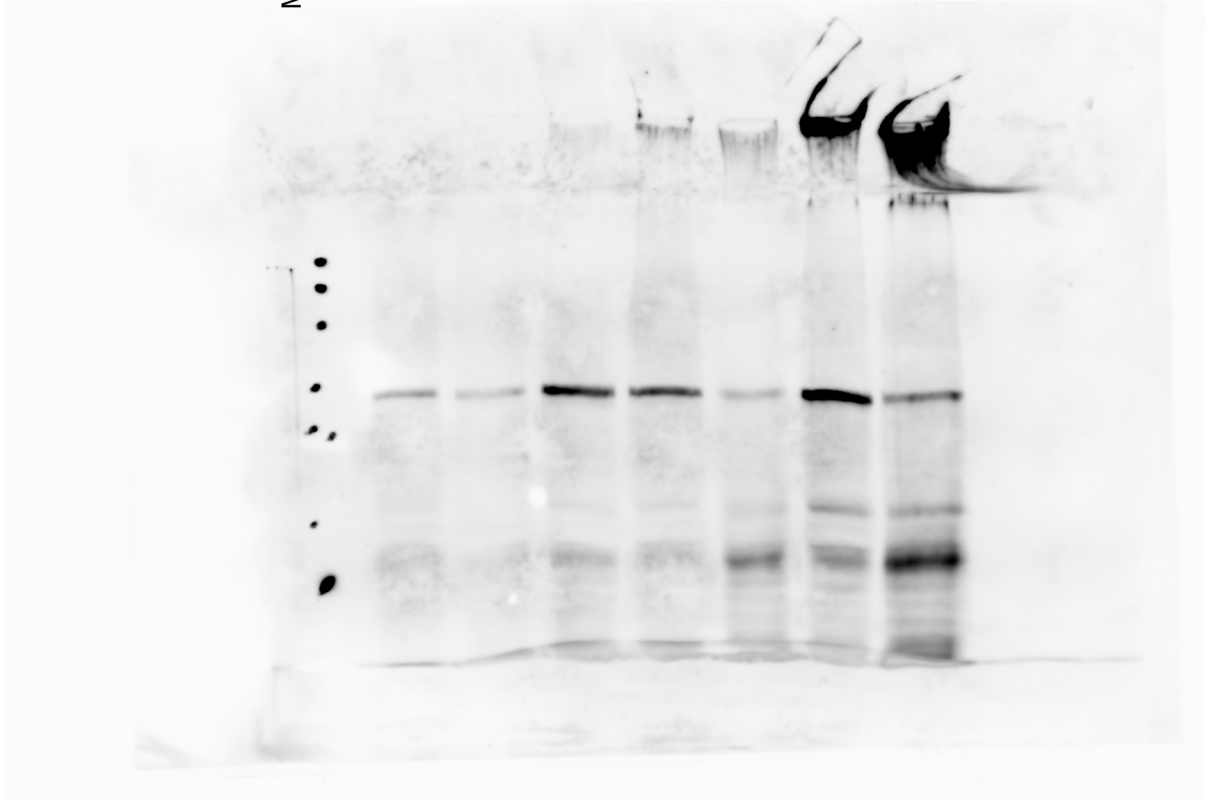

GFP

S2 FigB left panel

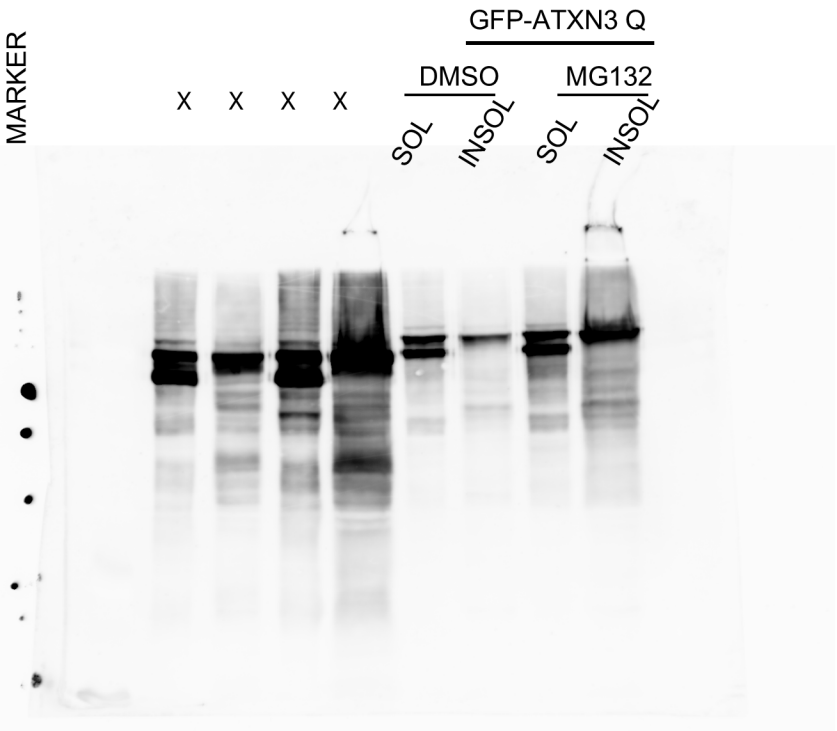

S2 FigB middle panel

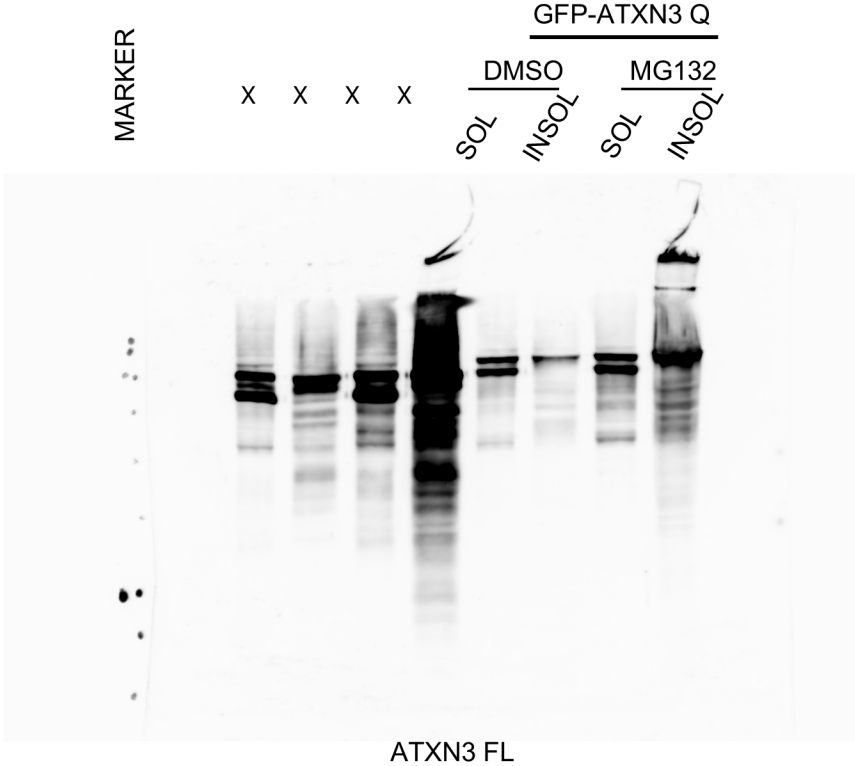

S2 FigB right panel

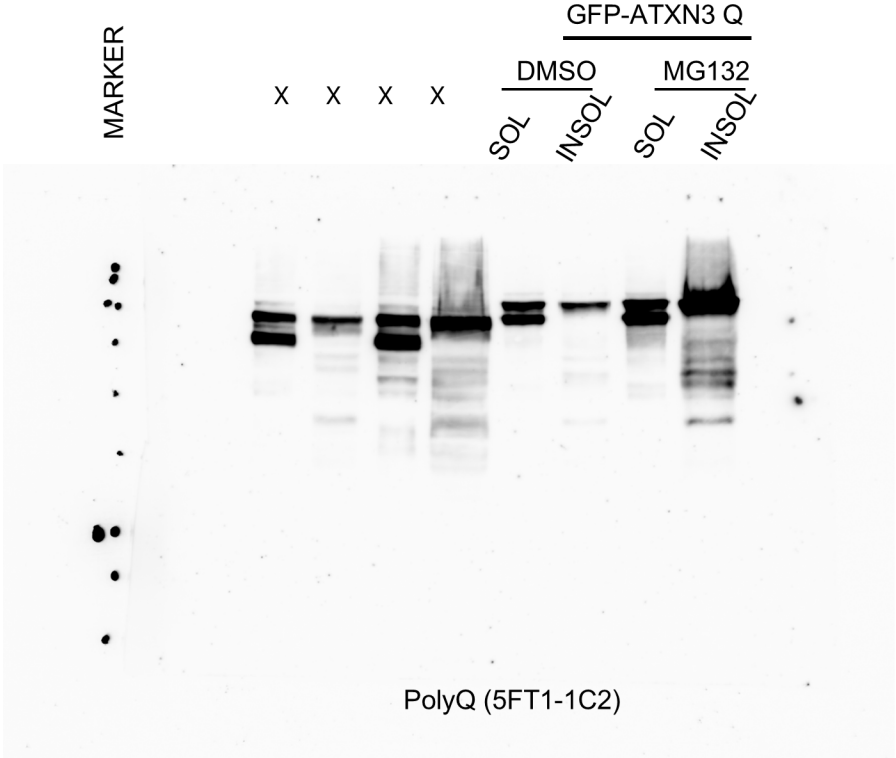

S2 Fig C left and right panels

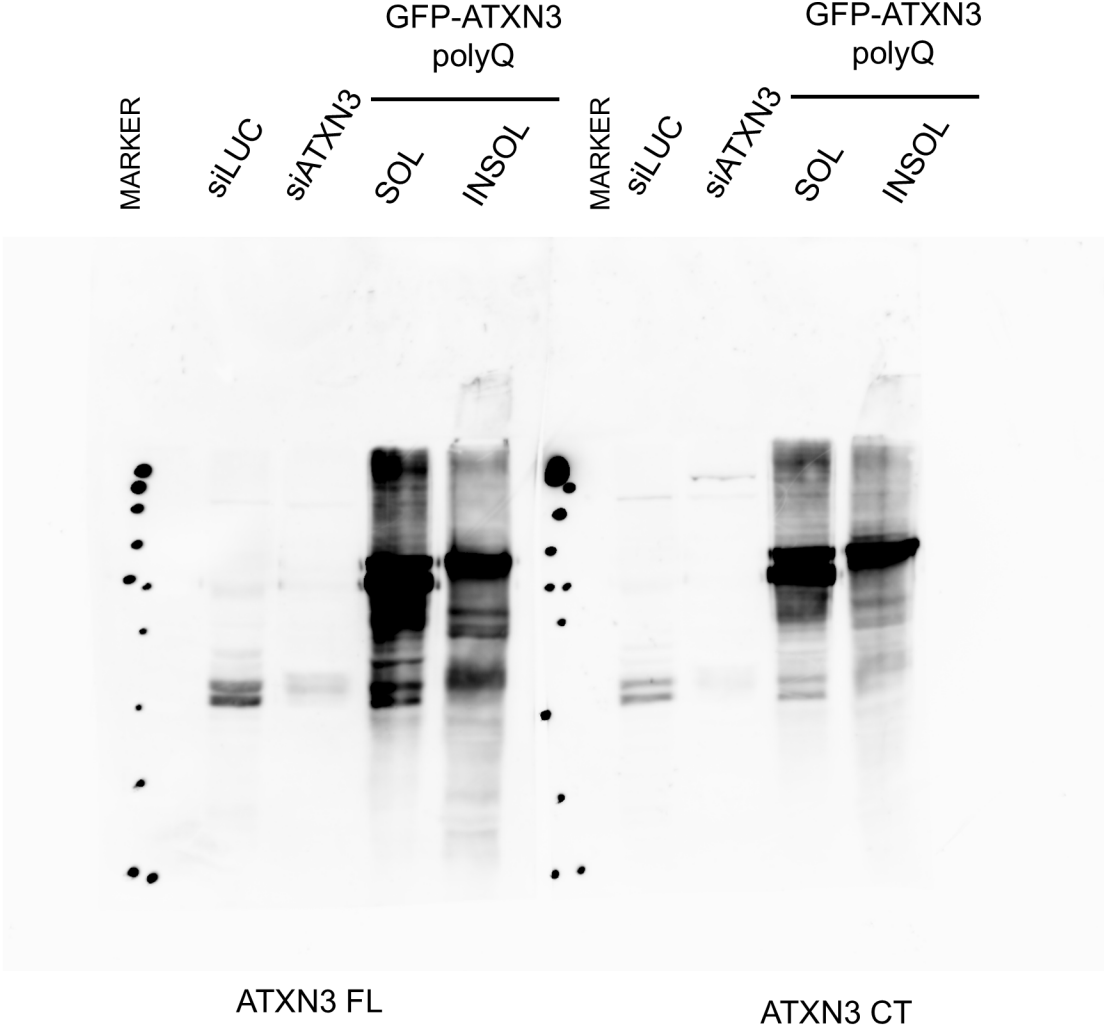

# S3 FigA

## GFP-ATXN3 polyQ

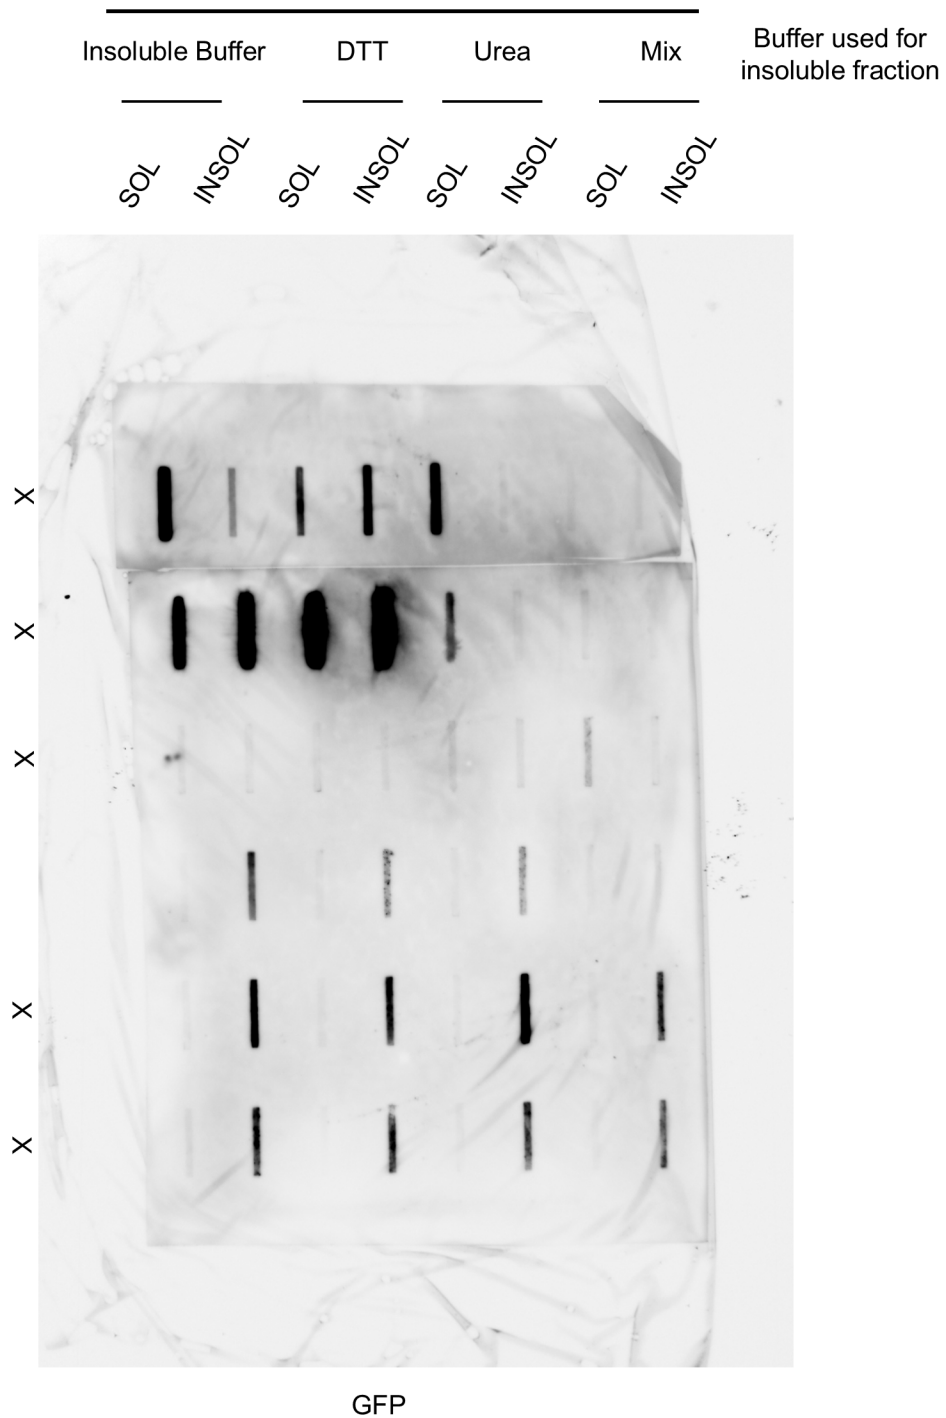

GFP

S3 FigB

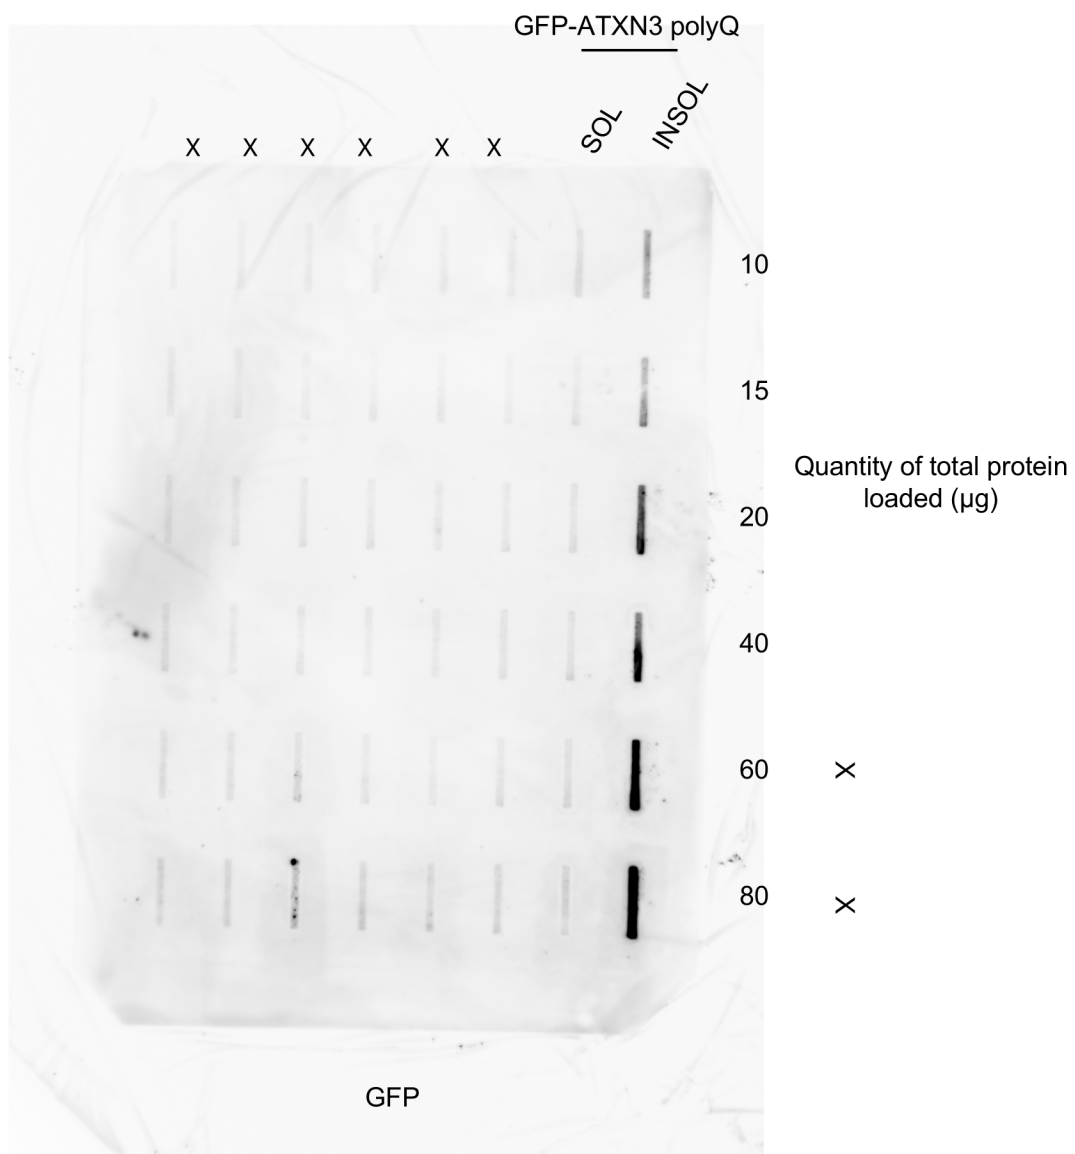

S4 Fig

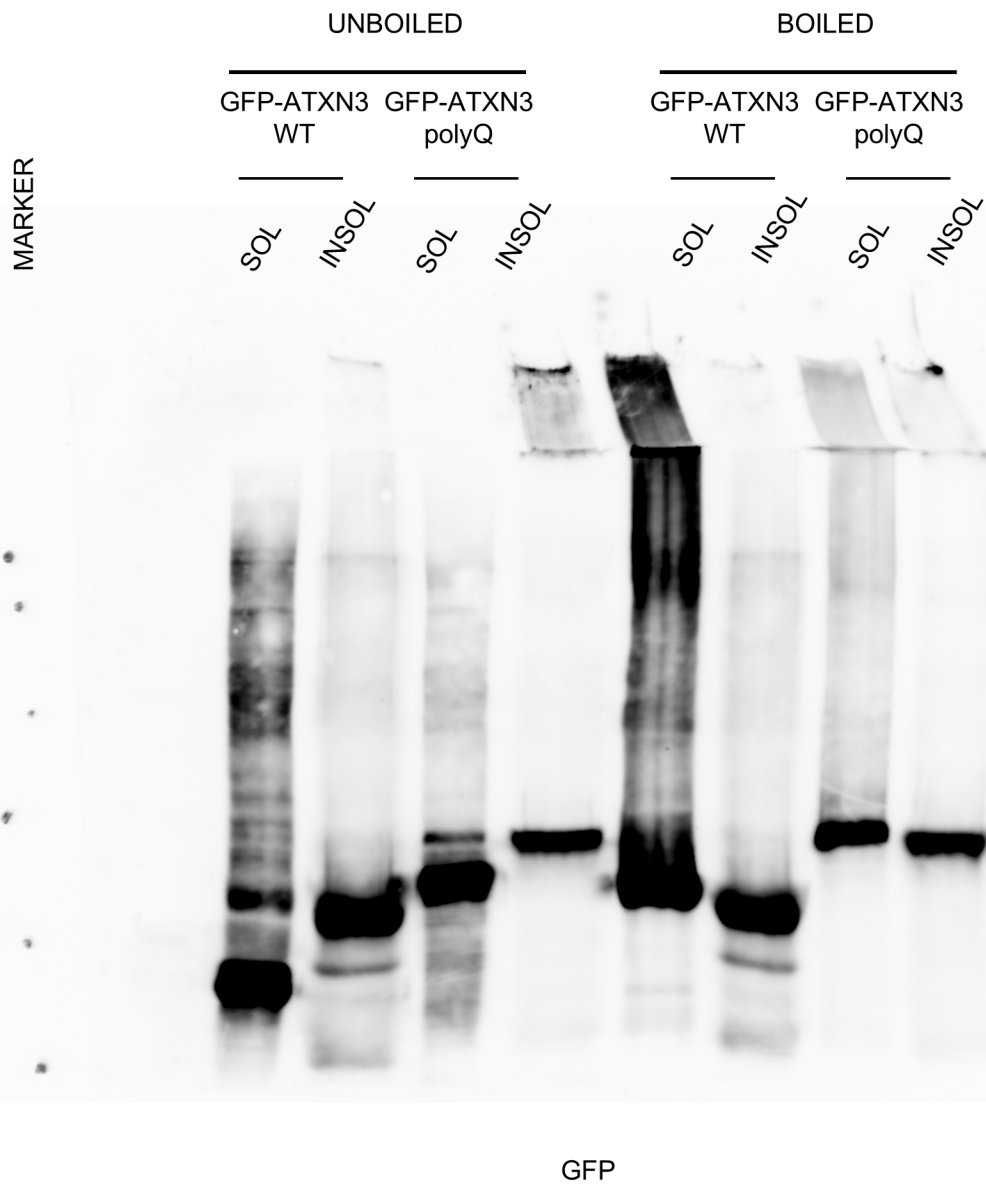

Supplement: pone.0315868.s006.pdf [file pone.0315868.s006.pdf]
